# Supplementary material
Source: Springer Nature journal article supplement (https://www.springermedizin.de/resource/supplementary/12889_2011_3946_MOESM2_ESM.pdf/9492762)
Supplement: MOESM2 [file 9492762]

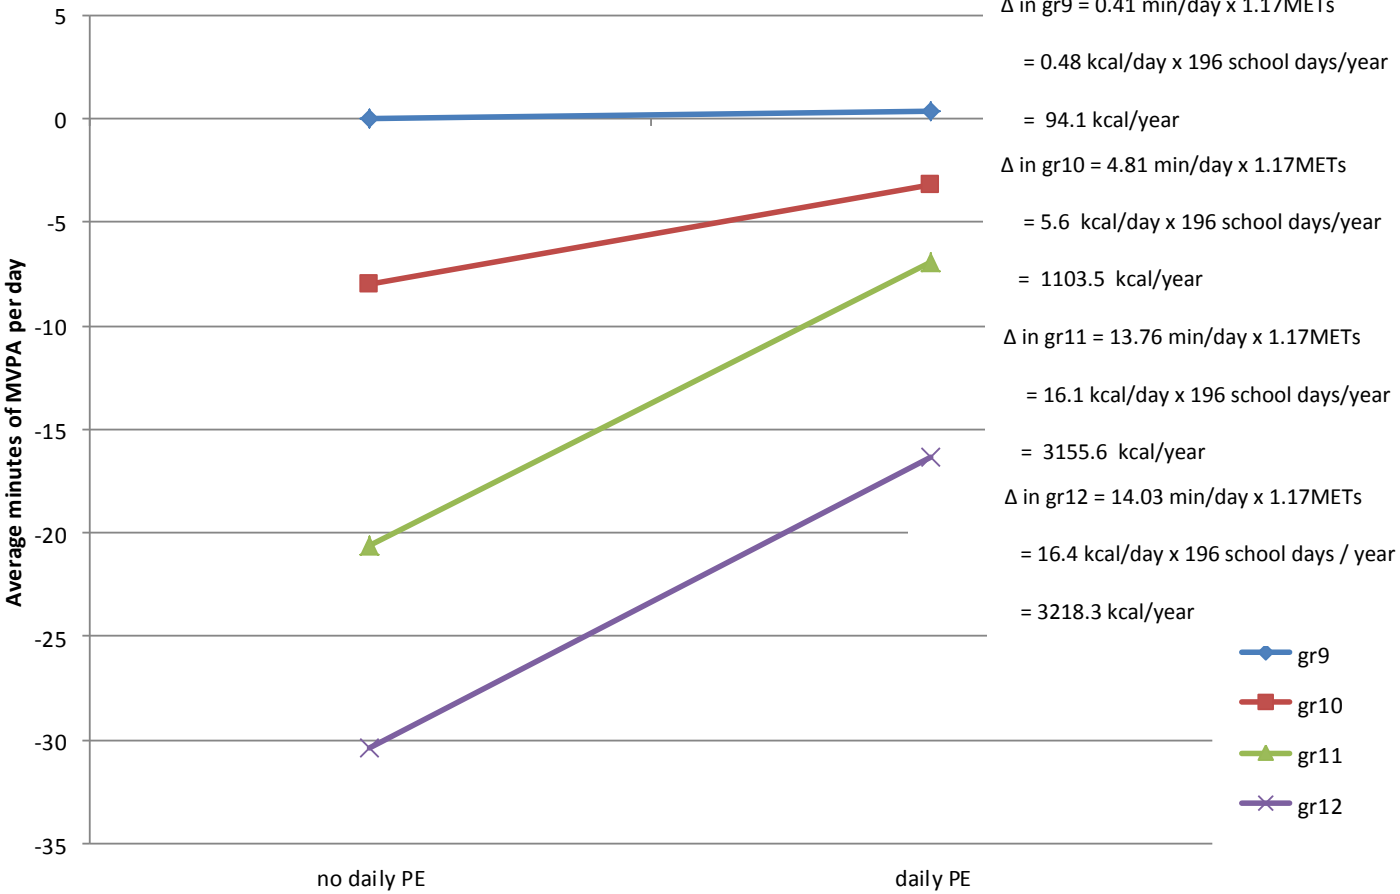

$\Delta$  in gr9 = 0.41 min/day x 1.17METs  
= 0.48 kcal/day x 196 school days/year  
= 94.1 kcal/year

$\Delta$  in gr10 = 4.81 min/day x 1.17METs  
= 5.6 kcal/day x 196 school days/year  
= 1103.5 kcal/year

$\Delta$  in gr11 = 13.76 min/day x 1.17METs  
= 16.1 kcal/day x 196 school days/year  
= 3155.6 kcal/year

$\Delta$  in gr12 = 14.03 min/day x 1.17METs  
= 16.4 kcal/day x 196 school days / year  
= 3218.3 kcal/year

- gr9
- gr10
- gr11
- gr12
